# Supplementary material
Source: publisher figshare collection journal article supplement (https://acs.figshare.com/ndownloader/files/14789753)
Supplement: Supplementary file 1 [file 14789753]

```

*****
*
*              ~~~~~
*              PERCEPTION
*              ~~~~~
*Knowledge Base Name      :tautomerism.kbase
*Description              :A knowledge base to identify molecules that undergo
*                          :tautomerism and generate new tautomers.
*Created by               :A.K.T. Ting
*Date of creation         :16-7-1997
*Last modified            :9-2-99
*Version                  :2.3
*****

```

Information :

New CAESA Rule Base substitution types :  
 add-taut-hydrogen

Tautomerism rules are labelled by number  
 Explanation gives the type of tautomerism the rule identifies  
 Diagrams above rules show an example of the application of that tautomerism rule.

This knowledge base is not comprehensive but serves to illustrate the rules.

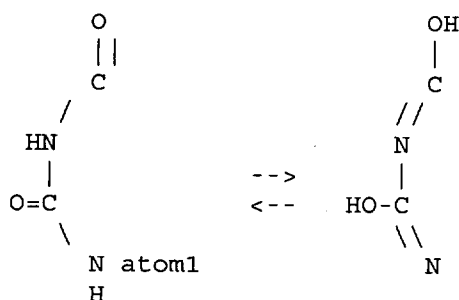

CHEMICAL-LABEL <tautomerism rule 1>

...STARTP

...N[HS>0]; [ARYL=YES] -C [ARYL=YES] (=O) -N[HS>0]; [ARYL=YES] -C [ARYL=YES] (=O)

...ENDP

RULE

EXPLANATION Extended Keto/Enol system.

IF tautomerism rule 1

THEN substitute-bond 1 with =

substitute-bond 2 with -

substitute-bond 4 with =

substitute-bond 5 with -

add-taut-hydrogen 3

add-taut-hydrogen 6

END-THEN

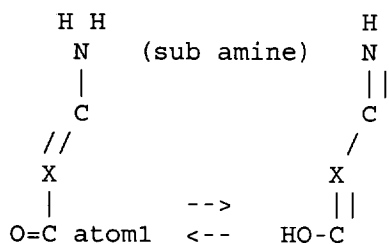

## Enaminoketone/enolimine tautomerism

CHEMICAL-LABEL &lt;tautomerism rule 2&gt;

...STARTP

...C [ARYL=YES] (=O) -X [ARYL=YES] =C [ARYL=YES] (-N [HS&gt;0] ; [RINGS=NO])

...ENDP

RULE

EXPLANATION Enaminoketone/enolimine tautomerism.

IF tautomerism rule 2

THEN substitute-bond 1 with -

substitute-bond 2 with =

substitute-bond 3 with -

substitute-bond 4 with =

add-taut-hydrogen 2

END-THEN

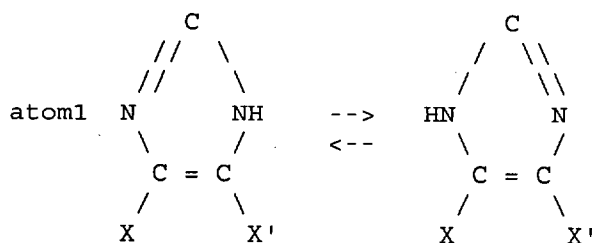

## Imidazole

CHEMICAL-LABEL &lt;tautomerism rule 3&gt;

...STARTP

...N [HS=0] ; [ARYL=YES] =C [ARYL=YES] -N [HS&gt;0] ; [ARYL=YES] -C [ARYL=YES]

...=C [ARYL=YES] -@1

...ENDP

RULE

EXPLANATION Imidazole ring.

IF tautomerism rule 3

THEN substitute-bond 1 with -

substitute-bond 2 with =

add-taut-hydrogen 1

END-THEN

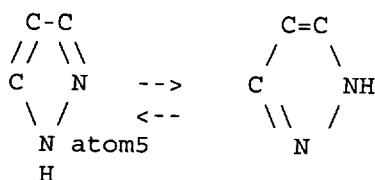

### Pyrazole

CHEMICAL-LABEL <tautomerism rule 4>

...STARTP

...N[HS=0]; [ARYL=YES]=C[ARYL=YES]-C[ARYL=YES]=C[ARYL=YES]-N[HS>0];

...[ARYL=YES]-@1

...ENDP

RULE

EXPLANATION Pyrazole ring.

IF tautomerism rule 4

THEN substitute-bond 1 with -

substitute-bond 2 with =

substitute-bond 3 with -

substitute-bond 4 with =

add-taut-hydrogen 1

END-THEN

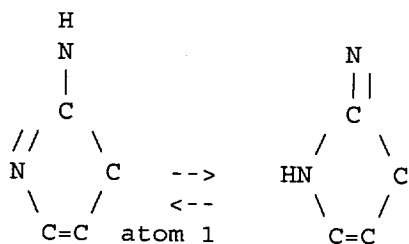

### 2-amino-pyrrole

CHEMICAL-LABEL <tautomerism rule 5>

...STARTP

...C=C-N[HS=0]; [ARYL=YES]=C[ARYL=YES](-N[HS>0])-C,S-@1

...ENDP

RULE

EXPLANATION 2-amino-pyrrole or 2-amino-thiazole.

IF tautomerism rule 5

THEN substitute-bond 3 with -

substitute-bond 4 with =

add-taut-hydrogen 3

END-THEN

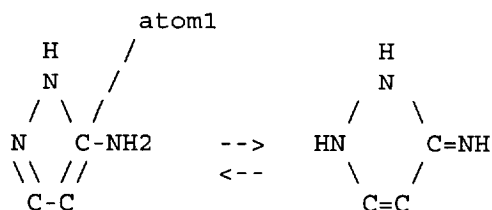

5-amino-pyrazole

CHEMICAL-LABEL &lt;tautomerism rule 6&gt;

...STARTP

...C [ARYL=YES] (-N [HS&gt;0]) =C [ARYL=YES] -C [ARYL=YES] =N [HS=0] ; [SAMERING=6] ;

... [ARYL=YES]

...-N [SAMERING=5] -@1

...ENDP

RULE

EXPLANATION 5-amino-pyrazole.

IF tautomerism rule 6

THEN substitute-bond 1 with =

substitute-bond 2 with -

substitute-bond 3 with =

substitute-bond 4 with -

add-taut-hydrogen 5

END-THEN

N.B. SAMERING=atomnum : means in same ring as atomnum

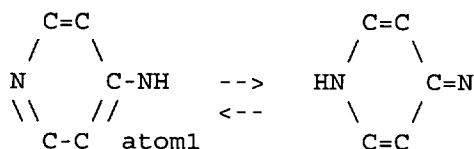

4-amino-pyridine

CHEMICAL-LABEL &lt;tautomerism rule 7&gt;

...STARTP

...C [ARYL=YES] -C [ARYL=YES] =N [HS=0] ; [ARYL=YES] -C=C-C (-N [HS&gt;0]) =@1

...ENDP

```

RULE
EXPLANATION 4-amino-pyridine.
IF tautomerism rule 7
THEN substitute-bond 1 with =
      substitute-bond 2 with -
      substitute-bond 6 with =
      substitute-bond 7 with -
      add-taut-hydrogen 3
END-THEN

```

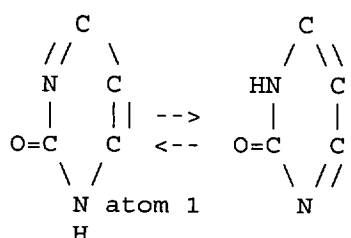

2-pyrimidone tautomerism type 1

```

CHEMICAL-LABEL <tautomerism rule 8>
...STARTP
...N[HS>0]; [ARYL=YES] -C [ARYL=YES] (=O) -N[HS=0]; [ARYL=YES] =C [ARYL=YES]
...-C [ARYL=YES] =C [ARYL=YES] -@1
...ENDP

```

```

RULE
EXPLANATION 2-pyrimidone tautomerism type 1.
IF tautomerism rule 8
THEN substitute-bond 4 with -
      substitute-bond 5 with =
      substitute-bond 6 with -
      substitute-bond 7 with =
      add-taut-hydrogen 4
END-THEN

```

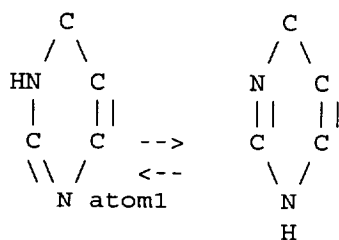

pyrimidine tautomerism type 1

CHEMICAL-LABEL <tautomerism rule 9>

...STARTP

...N[HS=0]; [ARYL=YES]=C,N[ARYL=YES]-N[HS>0]; [SAMERING=1]; [ARYL=YES]

...ENDP

RULE

EXPLANATION pyrimidine tautomerism type 1, also cover tetrazole, triazole, oxy-triazine, oxy-imidazole.

IF tautomerism rule 9

THEN substitute-bond 1 with -

substitute-bond 2 with =

add-taut-hydrogen 1

END-THEN

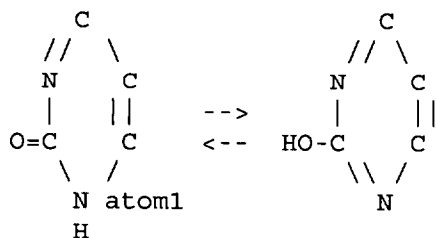

2(1H)-pyrimidone

CHEMICAL-LABEL <tautomerism rule 10>

...STARTP

...N[HS>0]; [ARYL=YES]-C[ARYL=YES](=O)-N[HS=0]; [ARYL=YES]=C[ARYL=YES]

...-C[ARYL=YES]=C[ARYL=YES]-@1

...ENDP

RULE

EXPLANATION Amide/hydroxyimine tautomerism in 2(1H)-pyrimidone.

IF tautomerism rule 10

THEN substitute-bond 1 with =

substitute-bond 2 with -

add-taut-hydrogen 3

END-THEN

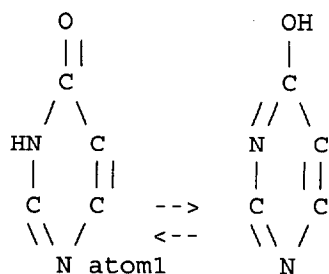

4(3H)-pyrimidone

CHEMICAL-LABEL <tautomerism rule 11>

...STARTP

...N[HS=0]; [ARYL=YES]=C[ARYL=YES]-N[HS>0]; [SAMERING=1]; [ARYL=YES]-C[ARYL=YES]

... (=X[HS=0]) -C[ARYL=YES]=C[ARYL=YES] -@1

...ENDP

RULE

EXPLANATION Amide/hydroxyimine on 4(3H)-pyrimidone ring.

IF tautomerism rule 11

THEN substitute-bond 3 with =

substitute-bond 4 with -

add-taut-hydrogen 5

END-THEN

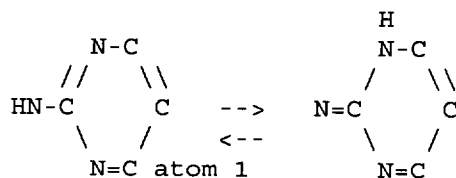

2(1H)-amino-pyrimidine

CHEMICAL-LABEL <tautomerism rule 12>

...STARTP

...C[HS=1]=N[HS=0]-C[ARYL=YES](-N[HS>0])=N[HS=0]; [ARYL=YES]-C[HS=1]=C[HS=1] -@1

...ENDP

RULE

EXPLANATION 2(1H)-amino-pyrimidine tautomerism.

IF tautomerism rule 12

THEN substitute-bond 3 with =

substitute-bond 4 with -

add-taut-hydrogen 5

END-THEN

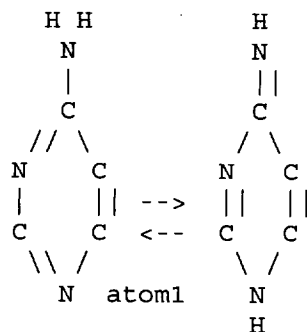

4 (1H) -amino-pyrimidine

CHEMICAL-LABEL <tautomerism rule 13>

...STARTP

...N[HS=0] ; [ARYL=YES] =C [HS=1] ; [ARYL=YES] -N [HS=0] ; [ARYL=YES] =C [ARYL=YES]

...(-N[HS>0])

...ENDP

RULE

EXPLANATION 4 (1H) -amino-pyrimidine tautomerism.

IF tautomerism rule 13

THEN substitute-bond 1 with -

substitute-bond 2 with =

substitute-bond 3 with -

substitute-bond 4 with =

add-taut-hydrogen 1

END-THEN



```
*****
                        ~~~~~
                        PERCEPTION
                        ~~~~~
*Knowledge Base Name   :charge.kbase
*Description           :A knowledge base to assign protonation states
*                      :according to estimated pKa values.
*Created by           :A.K.T. Ting
*Date of creation      :28-8-97
*Last modified         :8-2-99
*Version               :3.1
*****
```

#### Information :

~~~~~

New CAESA Rule Base substitution types :

add-prot-hydrogen

del-prot-hydrogen

Protonation behaviour is assigned by considering pKa value of compounds at pH7

1. pKa > 7 molecule will exist mainly in the protonated form at pH7
2. pKa < 7 molecule will exist mainly in the deprotonated form at pH7

Charges set in this kbase only represent the sign of the charge and not the magnitude.

Later rules override the effects of earlier ones.

This knowledge base is not comprehensive but serves to illustrate the rules.

#### pKa Reference :

~~~~~

(1) Joule, J. A.; Mills, K.; Smith, G.F. Heterocyclic Chemistry. London Chapman and Hall, 1994.

(2) Physical Methods in Heterocyclic Chemistry}, Katritzky, A.R., Ed., Academic Press, 1963; Vol. I.

(3) Physical Methods in Heterocyclic Chemistry}, Katritzky, A.R., Ed., Academic Press. 1971; Vol. III.

(4) Davies, D. T. Aromatic Heterocyclic Chemistry}. Oxford Science Publications, 1992.

(5) Comprehensive Heterocyclic Chemistry -- Part 2B: Six--membered Rings with Oxygen, Sulfur or Two or More Nitrogen Atoms}. Katritzky, A.R., Ed., Pergamon, 1984.

(6) Comprehensive Heterocyclic Chemistry -- Part 4B: Five--membered Rings with Two or More Oxygen, Sulfur or Nitrogen Atoms}. Katritzky, A.R., Ed., Pergamin, 1984.

(7) Handbook of Heterocyclic Chemistry}. Katritzky, A.R., Ed.; Pergamin, 1985.

(8) Merck Index}. Budavari, S., Ed.; MERCK; Co., Inc, 1996.

#### Sections:

~~~~~

1. Simple functional groups
2. 6 membered aromatic heterocyclic compounds {1 or more heteroatom(s)}
3. 5 membered aromatic heterocyclic compounds {2 or more heteroatoms}
4. Others

#### Simple functional groups

~~~~~

CHEMICAL-LABEL <Amine>

...STARTP

...C[ARYL=NO]-N[EPS=1];[SPCENTRE=3];[ARYL=NO]

...ENDP

RULE

EXPLANATION Amine protonated at pH 7.

IF Amine

THEN set-charge 2 to +1

add-prot-hydrogen 2

END-THEN

ArNH2

Aromatic Amine

CHEMICAL-LABEL <Aromatic Amine>

...STARTP

...C[ARYL=YES]-N[HS>0];[ARYL=NO]

...ENDP

RULE

EXPLANATION Aromatic amine is not protonated at pH 7.

IF Aromatic Amine

THEN set-charge 2 to 0

END-THEN

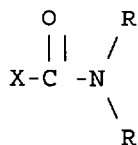

## Amide

```
CHEMICAL-LABEL <Amide>
...STARTP
...X-C(=O)-N[HS=0,1,2]
...ENDP
```

## RULE

```
EXPLANATION Amide, the N has no charge.
IF Amide
THEN set-charge 4 to 0
END-THEN
```

## CHEMICAL-LABEL &lt;Carboxylic Acid&gt;

```
...STARTP
...O[HS=1];[HETS=0]-C[HS=0,1];[RINGS=NO]=O
...ENDP
```

## RULE

```
EXPLANATION Carboxylic Acid is not protonated at pH7 and the double bond
normalised between the O's hence both have -ve charge.
IF Carboxylic Acid
THEN set-charge 1 to -1
      set-charge 3 to -1
END-THEN
```

## CHEMICAL-LABEL &lt;Carboxylate&gt;

```
...STARTP
...O[HS=0];[HETS=0];[CHARGE=ANION]-C[HS=0,1];[RINGS=NO]=O
...ENDP
```

## RULE

```
EXPLANATION In Carboxylate the double bond normalised between the Os
hence both have -ve charge.
IF Carboxylate
THEN set-charge 1 to -1
      set-charge 3 to -1
END-THEN
```

## CHEMICAL-LABEL &lt;Nitro&gt;

```
...STARTP
...C-N[CHARGE=CATION](=O)-O[CHARGE=ANION]
...ENDP
```

## RULE

```
EXPLANATION Nitro group has +ve charge on N and the double bond normalised
between the Os hence both Os have -ve charge.
IF Nitro
THEN set-charge 2 to +1
      set-charge 3 to -1
      set-charge 4 to -1
END-THEN
```

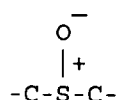

sulfoxide

```
CHEMICAL-LABEL <Sulphoxide>
...STARTP
...C(-S[CHARGE=NEUTRAL];[CONNECTIONS=3]=O[CHARGE=NEUTRAL]) -C
...ENDP
```

RULE

EXPLANATION Sulphoxide has +ve charge on S and -ve charge on O.

IF Sulphoxide

THEN set-charge 2 to +1

set-charge 3 to -1

END-THEN

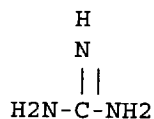

Guanidine

```
CHEMICAL-LABEL <Guanidine>
...STARTP
...N[HS=0,1];[ARYL=NO]=C[ARYL=NO](-N[HS=0,1,2];[ARYL=NO])
...-N[HS=0,1,2];[ARYL=NO]
...ENDP
```

RULE

EXPLANATION Guanidine protonated at =N and cation is stablized through resonance.

IF Guanidine

THEN set-charge 1 to +1

set-charge 3 to +1

set-charge 4 to +1

add-prot-hydrogen 1

END-THEN

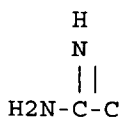

Amidine

CHEMICAL-LABEL <Amidine>

...STARTP

...N[HS=0,1];[ARYL=NO]=C[ARYL=NO](-N[HS=0,1,2];[ARYL=NO])-C[ARYL=NO]

...ENDP

RULE

EXPLANATION Amidine protonated at =N and cation is stablized through reasonance.

IF Amidine

THEN set-charge 1 to +1

set-charge 3 to +1

set-charge 4 to 0

add-prot-hydrogen 1

END-THEN

6 membered aromatic heterocyclic compounds

Pyridine

=====

Parent pyridine pKa = 5.12, therefore does not protonate at pH7.  
Molecules substituted with amino gp and without chloro or nitro gp present at the same time give pKa > 7

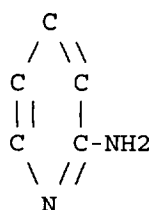

2-amino pyridine

CHEMICAL-LABEL <2-Amino Pyridine>

...STARTP

...N-,%C(-N[HS>0])=,%C-,%C=,%C-,%C=,%@1

...ENDP

RULE

EXPLANATION 2-Amino Pyridine protonated at ring N.

IF 2-Amino Pyridine

THEN set-charge 1 to +1

add-prot-hydrogen 1

END-THEN

CHEMICAL-LABEL <4-Amino Pyridine>

...STARTP

...N-,%C=,%C-,%C(-N[EPS=1])=,%C-,%C=,%@1

...ENDP

```

RULE
EXPLANATION 4-Amino Pyridine protonated at ring N.
IF 4-Amino Pyridine
THEN  set-charge 1 to +1
      add-prot-hydrogen 1
END-THEN

```

```

CHEMICAL-LABEL <3-Nitro-Pyridine>
...STARTP
...N-, %C=, %C(-N(-O)=O) -, %C=, %C-, %C=, %@1
...ENDP

```

```

RULE
EXPLANATION 3-Nitro Pyridine is not protonated at pH7.
IF 3-Nitro-Pyridine
THEN  set-charge 1 to 0
      set-charge 4 to 0
      del-prot-hydrogen 1
END-THEN

```

```

CHEMICAL-LABEL <2-Chloro-Pyridine>
...STARTP
...N-, %C(-Cl)=, %C-, %C=, %C-, %C=, %@1
...ENDP

```

```

RULE
EXPLANATION 2-Chloro Pyridine is not protonated at pH7.
IF 2-Chloro-Pyridine
THEN  set-charge 1 to 0
      del-prot-hydrogen 1
END-THEN

```

```

CHEMICAL-LABEL <4-Chloro-Pyridine>
...STARTP
...N-, %C=, %C-, %C(-Cl)=, %C-, %C=, %@1
...ENDP

```

```

RULE
EXPLANATION 4-Chloro Pyridine is not protonated at pH7.
IF 4-Chloro-Pyridine
THEN  set-charge 1 to 0
      del-prot-hydrogen 1
END-THEN

```

## 5 membered aromatic heterocyclic compounds

## Imidazole

=====

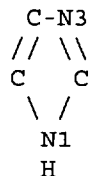

## imidazole

Parent imidazole pKa = 7.0

Molecules with amino gp substituents also have pKa > 7,  
in absence of 2- or 4- chloro or nitro gps.

CHEMICAL-LABEL &lt;Imidazole&gt;

...STARTP

...N[HS=1]-C=N-C=C-@1

...ENDP

## RULE

EXPLANATION Imidazole protonated at pH7.

IF Imidazole

THEN set-charge 1 to 0

set-charge 3 to +1

add-prot-hydrogen 3

END-THEN

CHEMICAL-LABEL &lt;2-Chloro Imidazole&gt;

...STARTP

...N[HS=1]-C(-Cl)=N-C=C-@1

...ENDP

## RULE

EXPLANATION 2-Chloro Imidazole is not protonated at pH7.

IF 2-Chloro Imidazole

THEN set-charge 1 to 0

set-charge 4 to 0

del-prot-hydrogen 4

END-THEN

CHEMICAL-LABEL &lt;4-Chloro Imidazole&gt;

...STARTP

...N[HS=1]-C=N-C(-Cl)=C-@1

...ENDP

## RULE

```

EXPLANATION 4-Chloro Imidazole is not protonated at pH7.
IF 4-Chloro Imidazole
THEN  set-charge 1 to 0
      set-charge 3 to 0
      del-prot-hydrogen 3
END-THEN

```

```

CHEMICAL-LABEL <5-Chloro Imidazole>
...STARTP
...N[HS=1] -C=N-C=C(-Cl) -@1
...ENDP

```

```

RULE
EXPLANATION 5-Chloro Imidazole is not protonated at pH7.
IF 5-Chloro Imidazole
THEN  set-charge 1 to 0
      set-charge 3 to 0
      del-prot-hydrogen 3
END-THEN

```

```

CHEMICAL-LABEL <2-Nitro Imidazole>
...STARTP
...N[HS=1] -C(-N[CHARGE=NEUTRAL,CATION] (-O[CHARGE=NEUTRAL,ANION])=O)
...=N-C=C-@1
...ENDP

```

```

RULE
EXPLANATION 2-Nitro Imidazole is not protonated at pH7.
IF 2-Nitro Imidazole
THEN  set-charge 1 to 0
      set-charge 6 to 0
      del-prot-hydrogen 6
END-THEN

```

```

CHEMICAL-LABEL <4-Nitro Imidazole>
...STARTP
...N[HS=1] -C=N-C(-N[CHARGE=NEUTRAL,CATION] (-O[CHARGE=NEUTRAL,ANION])=O)
...=C-@1
...ENDP

```

```

RULE
EXPLANATION 4-Nitro Imidazole is not protonated at pH7.
IF 4-Nitro Imidazole
THEN  set-charge 1 to 0
      set-charge 3 to 0
      del-prot-hydrogen 3
END-THEN

```



CHEMICAL-LABEL <5-Nitro Imidazole>

...STARTP

...N[HS=1] -C=N-C=C (-N[CHARGE=NEUTRAL, CATION] (-O[CHARGE=NEUTRAL, ANION])=O) -@1

...ENDP

RULE

EXPLANATION 5-Nitro Imidazole is not protonated at pH7.

IF 5-Nitro Imidazole

THEN set-charge 1 to 0

set-charge 3 to 0

del-prot-hydrogen 3

END-THEN

Others

~~~~~

Piperidine

=====

Parental piperidine has pKa > 7 and is cover by <Amine> rule

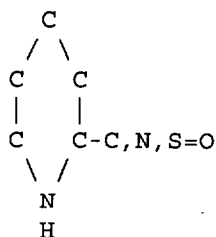

2-substituted-piperidine with electron withdrawing group

CHEMICAL-LABEL <2-Substituted Piperidine>

...STARTP

...N[HS=1] -C(-C,N,S=O) -C-C-C-C-@1

...ENDP

RULE

EXPLANATION 2-Substituted Piperidine not protonated at pH7.

IF 2-Substituted Piperidine

THEN set-charge 1 to 0

del-prot-hydrogen 1

END-THEN

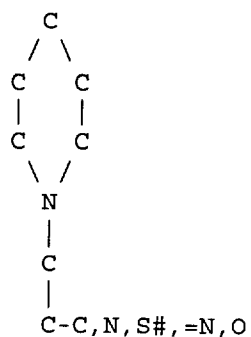

N-substituted Piperidine with electron withdrawing group

CHEMICAL-LABEL <N-Substituted Piperidine>

...STARTP

...N[HS=0] (-C-C, N, S#, =N, O) -C-C-C-C-C-@1

...ENDP

RULE

EXPLANATION N-Substituted Piperidine is not protonated at pH7.

IF N-Substituted Piperidine

THEN set-charge 1 to 0

del-prot-hydrogen 1

END-THEN

```
*****
                        ~~~~~
                        PERCEPTION
                        ~~~~~
*Knowledge Base Name   :Hproperty.kbase
*Description           :A simple knowledge base to identify HD and HA bonding
*                      :properties
*Created by           :A.K.T. Ting
*Date of creation      :13-5-1997
*Last modified        :23-4-99
*Version              :1.2
*****
```

Information :

~~~~~

New CAESA Rule Base substitution types :  
assign-atom

New atom assignment (assign-atom) allowed :  
HACCEPTOR  
HDONOR  
HBOTH  
HNEITHER  
HDXORHA

New atom features added to the PATRAN language :  
HDONOR HACCEPTOR HBOTH HEITHER HNEITHER NOT\_HDONOR NOT\_HACCEPTOR  
p.s. for more information about PATRAN see Reference Guide version 2.0.

Note :

1. The order of the rules in this kbase are ordered according to specificity.  
i.e. the more general rules come first and the more specific ones follow.  
e.g. Nitrogen with H rule will label all Nitrogens with H as both HA and HD  
and primary & secondary amide rule will change that to just HD.

2. CONNECTIONS - is defined as the number of non-hydrogen atom(s)  
connected to the target atom.

This knowledge base is not comprehensive but serves to illustrate the rules.

Sections:

~~~~~

- 1 Nitrogen
- 2 Oxygen
- 3 Halogens
- 4 Sulphur
- 5 Nitrogen groups
- 6 Oxygen groups
- 7 Sulphur groups
- 8 Phosphorus groups
- 9 Others

## Nitrogen

~~~~~

CHEMICAL-LABEL &lt;Nitrogen without H&gt;

...STARTP

...X&amp;N[HS=0];[CHARGE=NEUTRAL]

...ENDP

RULE

EXPLANATION Nitrogen without H is HA.

IF Nitrogen without H

THEN assign-atom 2 as HACCEPTOR

END-THEN

N.B. e.g. &lt;Nitrogen without H&gt; rule covers nitriles.

CHEMICAL-LABEL &lt;Nitrogen with H&gt;

...STARTP

...X&amp;N[HS&gt;0];[CHARGE=NEUTRAL]

...ENDP

RULE

EXPLANATION Nitrogen with H is both HA and HD.

IF Nitrogen with H

THEN assign-atom 2 as HBOTH

END-THEN

## Oxygen

~~~~~

CHEMICAL-LABEL &lt;Oxygen without H&gt;

...STARTP

...X&amp;O[HS=0]

...ENDP

RULE

EXPLANATION Oxygen without H is HA.

IF Oxygen without H

THEN assign-atom 2 as HACCEPTOR

END-THEN

N.B.

1. e.g. <Oxygen without H> rule covers carbonyls.
2. Oxygen with H case will be cover as <Alcohol> rule.

## Halogens

~~~~~

CHEMICAL-LABEL &lt;Fluoride&gt;

...STARTP

...X-F

...ENDP

```
RULE
EXPLANATION Fluoride is a weak HA.
IF Fluoride
THEN assign-atom 2 as HACCEPTOR
END-THEN
```

N.B. Fluoride is a weak Hydrogen acceptor.

```
CHEMICAL-LABEL <Chloride>
...STARTP
...X-Cl
...ENDP
```

```
RULE
EXPLANATION Chloride is HA.
IF Chloride
THEN assign-atom 2 as HACCEPTOR
END-THEN
```

Sulphur  
~~~~~

Note : The order of the rule : S without H & EPS  
                                  S with H  
                                  S with H & EPS

```
CHEMICAL-LABEL <Sulphur without H and EPS>
...STARTP
...C&S [HS=0] ; [EPS=0]
...ENDP
```

```
RULE
EXPLANATION Sulphur without H and EPS is neither HA nor HD.
IF Sulphur without H and EPS
THEN assign-atom 2 as HNEITHER
END-THEN
```

```
CHEMICAL-LABEL <Sulphur with H>
...STARTP
...C&S-H
...ENDP
```

```
RULE
EXPLANATION Sulphur with H is HD.
IF Sulphur with H
THEN assign-atom 2 as HDONOR
END-THEN
```

N.B. e.g. <Sulphur with H> covers thiols.

```
CHEMICAL-LABEL <Sulphur with H and EPS>
...STARTP
...C&S [HS>0]; [EPS>0]
...ENDP
```

```
RULE
EXPLANATION Sulphur with H and EPS is both HA and HD.
IF Sulphur with H and EPS
THEN assign-atom 2 as HBOTH
END-THEN
```

```
CHEMICAL-LABEL <Sulphur with EPS and no H>
...STARTP
...C&S [HS=0]; [EPS>0]
...ENDP
```

```
RULE
EXPLANATION Sulphur with EPS and no H is HA.
IF Sulphur with EPS and no H
THEN assign-atom 2 as HACCEPTOR
END-THEN
```

```
CHEMICAL-LABEL <Sulphur with H and no EPS>
...STARTP
...C&S [HS>0]; [EPS=0]
...ENDP
```

```
RULE
EXPLANATION Sulphur with H and no EPS is HD.
IF Sulphur with H and no EPS
THEN assign-atom 2 as HDONOR
END-THEN
```

#### Nitrogen groups

~~~~~

|  
-NH and -NH2 are donors only

Ref: Hydrogen bonding in biological structures by G A Jeffrey and W. Saenger.

```
CHEMICAL-LABEL <sp3 NH>
...STARTP
...X-N [HS=1,2]; [SPCENTRE=3]
...ENDP
```

```
RULE
EXPLANATION sp3 NH is HD.
IF sp3 NH
THEN assign-atom 2 as HDONOR
END-THEN
```

```

CHEMICAL-LABEL <aromatic NHs>
...STARTP
...X%N[HS>0]
...ENDP

```

```

RULE
EXPLANATION aromatic NHs is HD.
IF aromatic NHs
THEN assign-atom 2 as HDONOR
END-THEN

```

e.g. the aromatic N in Pyrrole.

```

cover cases : N+ -H
              NH4+
              RNH3+
              R2NH2+
              R3NH+

```

```

CHEMICAL-LABEL <N cation>
...STARTP
...N[HS>0];[CHARGE=CATION]
...ENDP

```

```

RULE
EXPLANATION N cation is HD.
IF N cation
THEN assign-atom 1 as HDONOR
END-THEN

```

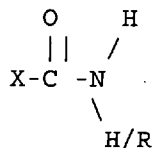

```

CHEMICAL-LABEL <Primary and Secondary Amide>
...STARTP
...X-C(=O)-N[HS=1,2]
...ENDP

```

```

RULE
EXPLANATION Primary and Secondary Amide, O is HA and N is HD.
IF Primary and Secondary Amide
THEN assign-atom 3 as HACCEPTOR
      assign-atom 4 as HDONOR
END-THEN

```

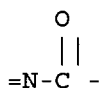

CHEMICAL-LABEL <Tertiary Amide>

...STARTP

...X-C(=O)-N[HS=0]

...ENDP

RULE

EXPLANATION Tertiary Amide, O is HA and N is neither HD nor HA.

IF Tertiary Amide

THEN assign-atom 3 as HACCEPTOR

assign-atom 4 as HNEITHER

END-THEN

CHEMICAL-LABEL <Tertiary Amine with sp2 character>

...STARTP

...C[SPCENTRE=2]-N[HS=0];[SPCENTRE=3]

...ENDP

RULE

EXPLANATION Sp3 N next to sp2 centre, N assumed to be sp2

Tertiary Amine with sp2 character is neither HA nor HD because electron delocalised into the sp2 system.

IF Tertiary Amine with sp2 character

THEN assign-atom 2 as HNEITHER

END-THEN

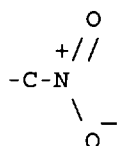

CHEMICAL-LABEL <Nitro>

...STARTP

...C-N[CHARGE=CATION](=O)-O[CHARGE=ANION]

...ENDP

RULE

EXPLANATION Nitro, N is neither HD nor HA, the two O are HAs due to normalisation.

IF Nitro

THEN assign-atom 2 as HNEITHER

assign-atom 3 as HACCEPTOR

assign-atom 4 as HACCEPTOR

END-THEN

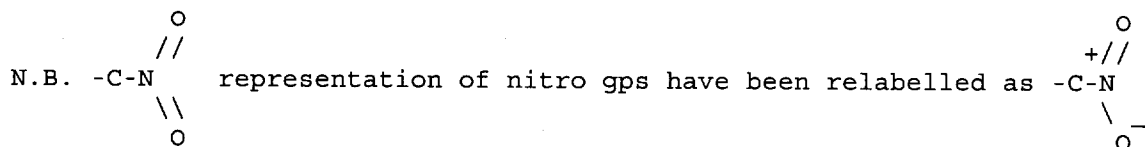



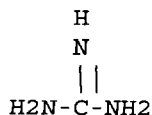

CHEMICAL-LABEL <Unsubstituted guanidine>

...STARTP

...N[HS=1]; [ARYL=NO]=C[ARYL=NO] (-N[HS=1,2]; [ARYL=NO]) -N[HS=1,2]; [ARYL=NO]

...ENDP

RULE

EXPLANATION Unsubstituted guanidine, all Ns are HDs.

IF Unsubstituted guanidine

THEN assign-atom 1 as HDONOR

assign-atom 3 as HDONOR

assign-atom 4 as HDONOR

END-THEN

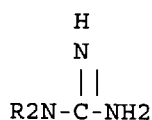

CHEMICAL-LABEL <1,1-Disubstituted guanidine>

...STARTP

...N[HS=1,2]=C[ARYL=NO] (-N[HS=0]; [ARYL=NO]) -N[HS=1,2]

...ENDP

RULE

EXPLANATION 1,1-Disubstituted guanidine, N without H is neither HA nor HD and other Ns are HDs.

IF 1,1-Disubstituted guanidine

THEN assign-atom 1 as HDONOR

assign-atom 3 as HNEITHER

assign-atom 4 as HDONOR

END-THEN

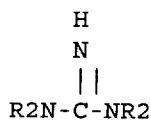

CHEMICAL-LABEL <1,1,3,3,-tetrasubstituted guanidine>

...STARTP

...N[HS=1]; [ARYL=NO]=C[ARYL=NO] (-N[HS=0]; [ARYL=NO]) -N[HS=0]; [ARYL=NO]

...ENDP

RULE

EXPLANATION 1,1,3,3,-tetrasubstituted guanidine, only the NHs group is HD.

IF 1,1,3,3,-tetrasubstituted guanidine

THEN assign-atom 1 as HDONOR

assign-atom 3 as HNEITHER

assign-atom 4 as HNEITHER

END-THEN

CHEMICAL-LABEL <Amidine>

...STARTP

...C[ARYL=NO] (=N[HS=1]; [ARYL=NO]) -N[HS=1,2]; [ARYL=NO]

...ENDP

RULE

EXPLANATION Amidine, both Ns are HDs.

IF Amidine

THEN assign-atom 2 as HDONOR

assign-atom 3 as HDONOR

END-THEN

Oxygen groups

~~~~~

CHEMICAL-LABEL <Alcohol>

...STARTP

...X-O[HS=1]

...ENDP

RULE

EXPLANATION Alcohol is both HA and HD.

IF Alcohol

THEN assign-atom 2 as HBOTH

END-THEN

-C=O

|

OH

CHEMICAL-LABEL <Non-normalised Carboxylic Acid>

...STARTP

...O[HS=1]; [HETS=0] -C[HS=0,1]; [RINGS=NO] =O[HETS=0]; [HS=0]

...ENDP

RULE

EXPLANATION Carboxylic Acid deprotonated at pH7 and the double bond is normalised between the Os and hence both HAs.

IF Non-normalised Carboxylic Acid

THEN assign-atom 1 as HACCEPTOR

assign-atom 3 as HACCEPTOR

END-THEN

CHEMICAL-LABEL <Deprotonated Carboxylic Acid>

...STARTP

...O[CHARGE=ANION]; [HETS=0] -C[HS=0,1]; [RINGS=NO] =O[CHARGE=ANION]; [HETS=0]

...ENDP

## RULE

EXPLANATION Carboxylic Acid deprotonated at pH7 and the double bond is normalised between the Os and hence both HAs.

IF Deprotonated Carboxylic Acid

THEN assign-atom 1 as HACCEPTOR

assign-atom 3 as HACCEPTOR

END-THEN

N.B. Since after protonation perception, acid groups are deprotonated and both Os have negative charges, therefore Deprotonated Carboxylic Acid rule needed to correctly identify Hproperties.

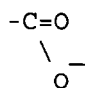

CHEMICAL-LABEL <Carboxylate>

...STARTP

...O [HS=0] ; [HETS=0] ; [CHARGE=ANION] -C [HS=0, 1] ; [RINGS=NO] =O [HETS=0] ; [HS=0]

...ENDP

## RULE

EXPLANATION Carboxylate, the double bond is normalised between the Os and hence both Os are HAs.

IF Carboxylate

THEN assign-atom 1 as HACCEPTOR

assign-atom 3 as HACCEPTOR

END-THEN

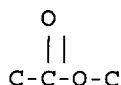

CHEMICAL-LABEL <Ester>

...STARTP

...C-O [HS=0] ; [HETS=0] ; [CHARGE=NEUTRAL] -C (=O) -C

...ENDP

## RULE

EXPLANATION Ester, both Os are HAs, -O- a weak HA.

IF Ester

THEN assign-atom 2 as HACCEPTOR

assign-atom 4 as HACCEPTOR

END-THEN

## Sulphur groups

## Sulfoxide :

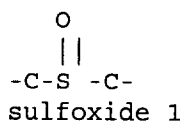

Ref : (O=S)gps is an acceptor gp according to Jeffrey Hydrogen bonding bk p.22

```

CHEMICAL-LABEL <Sulphoxide without charge>
...STARTP
...C(-S[CHARGE=NEUTRAL]=O[CHARGE=NEUTRAL]) -C
...ENDP

```

## RULE

```

EXPLANATION Sulphoxide without charge, both O and S are HAs.
IF Sulphoxide without charge
THEN assign-atom 2 as HACCEPTOR
      assign-atom 3 as HACCEPTOR
END-THEN

```

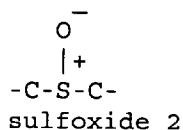

```

CHEMICAL-LABEL <Sulphoxide with charge>
...STARTP
...C(-S[CHARGE=CATION]-O[CHARGE=ANION]) -C
...ENDP

```

## RULE

```

EXPLANATION Sulphoxide with charge, both O and S are HAs.
IF Sulphoxide with charge
THEN assign-atom 2 as HACCEPTOR
      assign-atom 3 as HACCEPTOR
END-THEN

```

Sulfonamide (R<sub>2</sub>N-SO<sub>2</sub>R') :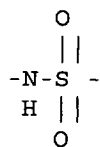

```

CHEMICAL-LABEL <Sulphonamide with acidic H>
...STARTP
...X&N[HS=1,2](-S[CONNECTIONS=4];[HS=0](=O)=O)
...ENDP

```

## RULE

EXPLANATION Sulphonamide with acidic H, the N with acidic H is HD and both Os are HA and S neither HA nor HD.

IF Sulphonamide with acidic H

THEN assign-atom 2 as HDONOR

assign-atom 3 as HNEITHER

assign-atom 4 as HACCEPTOR

assign-atom 5 as HACCEPTOR

END-THEN

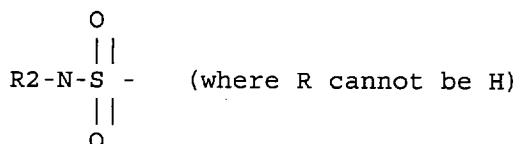

CHEMICAL-LABEL <Sulphonamide without acidic H>

...STARTP

...X&N[HS=0] (-S[CONNECTIONS=4]; [HS=0] (=O)=O)

...ENDP

## RULE

EXPLANATION Sulphonamide without acidic H, both Os are HA, and N without acidic H and S are neither HA nor HD.

IF Sulphonamide without acidic H

THEN assign-atom 2 as HNEITHER

assign-atom 3 as HNEITHER

assign-atom 4 as HACCEPTOR

assign-atom 5 as HACCEPTOR

END-THEN

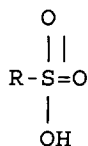

CHEMICAL-LABEL <Sulfonic acid>

...STARTP

...O[HS=1]-S[CONNECTIONS=4]; [RINGS=NO] (=O)=O

...ENDP

## RULE

EXPLANATION Sulfonic Acid deprotonated in pH7 and the double bond is normalised between the Os and hence both HAs.

IF Sulfonic acid

THEN assign-atom 1 as HACCEPTOR

assign-atom 2 as HNEITHER

assign-atom 3 as HACCEPTOR

assign-atom 4 as HACCEPTOR

END-THEN

## Phosphorus group

-----

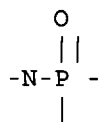

CHEMICAL-LABEL <Phosphoramidate with fully substituted N>  
 ...STARTP  
 ...N[HS=0]-P=O  
 ...ENDP

## RULE

EXPLANATION Phosphoramidate with N only, N is neither HD nor HA, and O is a HA.

IF Phosphoramidate with fully substituted N  
 THEN assign-atom 1 as HNEITHER  
       assign-atom 3 as HACCEPTOR  
 END-THEN

N.B. similar to sulphonamide case where N is never HA and O is a HA.

CHEMICAL-LABEL <Phosphoramidate with NH>  
 ...STARTP  
 ...N[HS>0]-P=O  
 ...ENDP

## RULE

EXPLANATION Phosphoramidate with NH, N is HD and O is a HA.  
 IF Phosphoramidate with NH  
 THEN assign-atom 1 as HDONOR  
       assign-atom 3 as HACCEPTOR  
 END-THEN

N.B. Other cases where O=P[HETS=0] will be cover by rule <O without H>

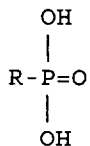

CHEMICAL-LABEL <Phosphonic acid>  
 ...STARTP  
 ...O[HS=1]-P[CONNECTIONS=4]; [RINGS=NO] (=O)-O[HS=1]  
 ...ENDP

## RULE

EXPLANATION Phosphonic Acids are strong acids and therefore deprotonated at both OH gps at pH7 .  
 IF Phosphonic acid  
 THEN assign-atom 1 as HACCEPTOR  
       assign-atom 3 as HACCEPTOR  
       assign-atom 4 as HACCEPTOR  
 END-THEN

Others

~~~~~

CHEMICAL-LABEL <Water>

...STARTP

...H-O-H

...ENDP

RULE

EXPLANATION water is both HA and HD.

IF Water

THEN assign-atom 2 as HBOTH

END-THEN
